# Supplementary material
Source: MDPI journal article supplement (https://www.mdpi.com/2311-7524/8/5/372)
Supplement: s1 [file s1]

Table S1. Primers used for amplification of *HSP*, *HSF*, *60SL36* and *CYC* sequences.

| Gene Name        | Gene ID                                                              | Primer Sequence<br>(5' → 3')                                          | Amplicon<br>length (bp) |
|------------------|----------------------------------------------------------------------|-----------------------------------------------------------------------|-------------------------|
| <i>StHSP17.6</i> | PGSC0003DMG400030426<br>PGSC0003DMG400030339<br>PGSC0003DMG400030340 | <i>f</i> : TCATGTGTTCAAGGCCGATCT<br><i>r</i> : TCCACGCGATGCCACTTAT    | 138                     |
| <i>StHSP21</i>   | PGSC0003DMG400003219                                                 | <i>f</i> : ACGCACTCCTTGGGACATTC<br><i>r</i> : CGGGAGACTTAAACGAGTGTCAT | 205                     |
| <i>StHSP23.9</i> | PGSC0003DMG400004808                                                 | <i>f</i> : CAATTAGAAGCGTGAGCCAGC<br><i>r</i> : CAGAGCGTTATCGTCCTCCT   | 137                     |
| <i>StHSP70-1</i> | PGSC0003DMG400024887                                                 | <i>f</i> : TGATGGAATTCCTCCTGCCC<br><i>r</i> : CCATTCTCTCGACCTCATCACC  | 170                     |
| <i>StHSP70-2</i> | PGSC0003DMG400027611                                                 | <i>f</i> : AGGCAATCGGTGGTGAATCC<br><i>r</i> : TTTCTCAAGACCTGAGCCGAA   | 200                     |
| <i>StHSP101</i>  | PGSC0003DMG400024644                                                 | <i>f</i> : TCTGCCGTCACCAACTGAAG<br><i>r</i> : TGCACCATACACCGGATCATAG  | 122                     |
| <i>StHSFA2</i>   | PGSC0003DMG400008223                                                 | <i>f</i> : GGTTTCCTGGGAGGGCAG<br><i>r</i> : CCAATTTCAATGCAAGCGCC      | 104                     |
| <i>StHSFA3</i>   | PGSC0003DMG401002683                                                 | <i>f</i> : CGTGGGACGGTTCAACAAAT<br><i>r</i> : GAAGACGACCCCACTCCATC    | 221                     |
| <i>StHSFA5</i>   | PGSC0003DMG400004662                                                 | <i>f</i> : GCTCAATACTTACGGCTTCCG<br><i>r</i> : TGGAACCTGGAGGGTGACTA   | 143                     |
| <i>60SL36</i>    | PGSC0003DMT400000483                                                 | <i>f</i> : GGGAAGTAGCTGGTTTTGCAC<br><i>r</i> : TCCAGTAGCCCTCATTTTACGG | 170                     |
| <i>CYC</i>       | PGSC0003DMG400001630                                                 | <i>f</i> : CTCTTCGCCGATACCACTCC<br><i>r</i> : TCACACGGTGGGAAGGTTGAG   | 121                     |

Note: *f*- forward, *r*- reverse
