# Supplementary material
Source: MDPI journal article supplement (https://www.mdpi.com/2311-7524/8/5/372)
Supplement: s1 [file s1]

Table S2. Analysis of variance table (type I SS) for Survival of explants.

| Term                    | df | Sum Sq | Mean Sq | F-value | p-value  | Signif |
|-------------------------|----|--------|---------|---------|----------|--------|
| Cultivar                | 2  | 1701.9 | 850.9   | 7.146   | 1.32E-03 | **     |
| Temperature             | 2  | 9274.1 | 4637.0  | 38.942  | 6.54E-13 | ***    |
| SA                      | 1  | 1008.3 | 1008.3  | 8.468   | 4.55E-03 | **     |
| Cultivar:Temperature    | 4  | 1525.9 | 381.5   | 3.204   | 1.65E-02 | *      |
| Cultivar:SA             | 2  | 216.7  | 108.3   | 0.910   | 4.06E-01 |        |
| Temperature:SA          | 2  | 1088.9 | 544.4   | 4.572   | 1.28E-02 | *      |
| Cultivar:Temperature:SA | 4  | 344.4  | 86.1    | 0.723   | 5.78E-01 |        |

Note: \* p<0.05, \*\* p<0.01, \*\*\* p<0.001; the p values which indicate significant effects are marked with the red color font. The same refers to the tables listed below.

Table S3. Analysis of variance table (type I SS) for Number of leaves/nodes.

| Term                    | df | Sum Sq | Mean Sq | F-value | p-value  | Signif |
|-------------------------|----|--------|---------|---------|----------|--------|
| Cultivar                | 2  | 132.42 | 66.21   | 69.60   | 0.00E-01 | ***    |
| Temperature             | 2  | 309.27 | 154.64  | 162.55  | 0.00E-01 | ***    |
| SA                      | 1  | 60.98  | 60.98   | 64.11   | 3.44E-15 | ***    |
| Cultivar:Temperature    | 4  | 92.22  | 23.05   | 24.23   | 0.00E-01 | ***    |
| Cultivar:SA             | 2  | 30.57  | 15.29   | 16.07   | 1.37E-07 | ***    |
| Temperature:SA          | 2  | 15.64  | 7.82    | 8.22    | 2.88E-04 | ***    |
| Cultivar:Temperature:SA | 4  | 21.67  | 5.42    | 5.69    | 1.57E-04 | ***    |

Table S4. Analysis of variance table (type I SS) for Shoot length.

| Term                    | df | Sum Sq | Mean Sq | F-value | p-value  | Signif |
|-------------------------|----|--------|---------|---------|----------|--------|
| Cultivar                | 2  | 1165.1 | 582.5   | 19.034  | 5.54E-07 | ***    |
| Temperature             | 2  | 9369.9 | 4685.0  | 153.081 | 0.00E-01 | ***    |
| SA                      | 1  | 2407.2 | 2407.2  | 78.656  | 4.01E-12 | ***    |
| Cultivar:Temperature    | 4  | 2864.1 | 716.0   | 23.396  | 2.94E-11 | ***    |
| Cultivar:SA             | 2  | 138.4  | 69.2    | 2.262   | 1.14E-01 |        |
| Temperature:SA          | 2  | 584.1  | 292.1   | 9.544   | 2.82E-04 | ***    |
| Cultivar:Temperature:SA | 4  | 323.7  | 80.9    | 2.644   | 4.33E-02 | *      |

Table S5. Analysis of variance table (type I SS) for Shoot mass.

| Term                    | df | Sum Sq   | Mean Sq | F-value | p-value  | Signif |
|-------------------------|----|----------|---------|---------|----------|--------|
| Cultivar                | 2  | 108816.9 | 54408.5 | 158.917 | 0.00E-01 | ***    |
| Temperature             | 2  | 65047.9  | 32524.0 | 94.996  | 0.00E-01 | ***    |
| SA                      | 1  | 23658.1  | 23658.1 | 69.101  | 3.10E-11 | ***    |
| Cultivar:Temperature    | 4  | 18804.6  | 4701.1  | 13.731  | 8.65E-08 | ***    |
| Cultivar:SA             | 2  | 5680.5   | 2840.3  | 8.296   | 7.22E-04 | ***    |
| Temperature:SA          | 2  | 1516.5   | 758.2   | 2.215   | 1.19E-01 |        |
| Cultivar:Temperature:SA | 4  | 5820.7   | 1455.2  | 4.250   | 4.61E-03 | **     |

Table S6. Analysis of variance table (type I SS) for Number of roots.

| Term                    | df | Sum Sq  | Mean Sq | F-value | p-value  | Signif |
|-------------------------|----|---------|---------|---------|----------|--------|
| Cultivar                | 2  | 136.179 | 68.090  | 145.150 | 0.00E-01 | ***    |
| Temperature             | 2  | 11.872  | 5.936   | 12.654  | 3.11E-05 | ***    |
| SA                      | 1  | 0.387   | 0.387   | 0.824   | 3.68E-01 |        |
| Cultivar:Temperature    | 4  | 12.653  | 3.163   | 6.743   | 1.78E-04 | ***    |
| Cultivar:SA             | 2  | 0.220   | 0.110   | 0.234   | 7.92E-01 |        |
| Temperature:SA          | 2  | 0.162   | 0.081   | 0.173   | 8.41E-01 |        |
| Cultivar:Temperature:SA | 4  | 2.165   | 0.541   | 1.154   | 3.42E-01 |        |

Table S7. Analysis of variance table (type I SS) for Root length.

| Term                    | df | Sum Sq  | Mean Sq | F-value | p-value  | Signif |
|-------------------------|----|---------|---------|---------|----------|--------|
| Cultivar                | 2  | 1526.8  | 763.4   | 10.213  | 1.01E-04 | ***    |
| Temperature             | 2  | 5616.3  | 2808.2  | 37.570  | 1.37E-12 | ***    |
| SA                      | 1  | 24934.5 | 24934.5 | 333.591 | 0.00E-01 | ***    |
| Cultivar:Temperature    | 4  | 808.6   | 202.1   | 2.704   | 3.53E-02 | *      |
| Cultivar:SA             | 2  | 1079.8  | 539.9   | 7.223   | 1.23E-03 | **     |
| Temperature:SA          | 2  | 148.3   | 74.2    | 0.992   | 3.75E-01 |        |
| Cultivar:Temperature:SA | 4  | 581.1   | 145.3   | 1.944   | 1.10E-01 |        |

Table S8. Analysis of variance table (type I SS) for Root mass.

| <b>Term</b>             | <b>df</b> | <b>Sum Sq</b> | <b>Mean Sq</b> | <b>F-value</b> | <b>p-value</b> | <b>Signif</b> |
|-------------------------|-----------|---------------|----------------|----------------|----------------|---------------|
| Cultivar                | 2         | 47932.6       | 23966.3        | 189.006        | 0.00E-01       | ***           |
| Temperature             | 2         | 10136.7       | 5068.4         | 39.971         | 3.78E-13       | ***           |
| SA                      | 1         | 11914.5       | 11914.5        | 93.962         | 1.22E-15       | ***           |
| Cultivar:Temperature    | 4         | 4280.9        | 1070.2         | 8.440          | 7.90E-06       | ***           |
| Cultivar:SA             | 2         | 2638.1        | 1319.0         | 10.402         | 8.63E-05       | ***           |
| Temperature:SA          | 2         | 1096.9        | 548.5          | 4.325          | 1.61E-02       | *             |
| Cultivar:Temperature:SA | 4         | 2423.7        | 605.9          | 4.778          | 1.53E-03       | **            |
